# Supplementary material for: Fatal myositis and spontaneous haematoma induced by combined immune checkpoint inhibitor treatment in a patient with pancreatic adenocarcinoma
Source: Springer Nature journal article supplement (doi:10.1186/s12885-019-6372-z), 2019-12-01
Supplement: MOESM3 [file 17473822]

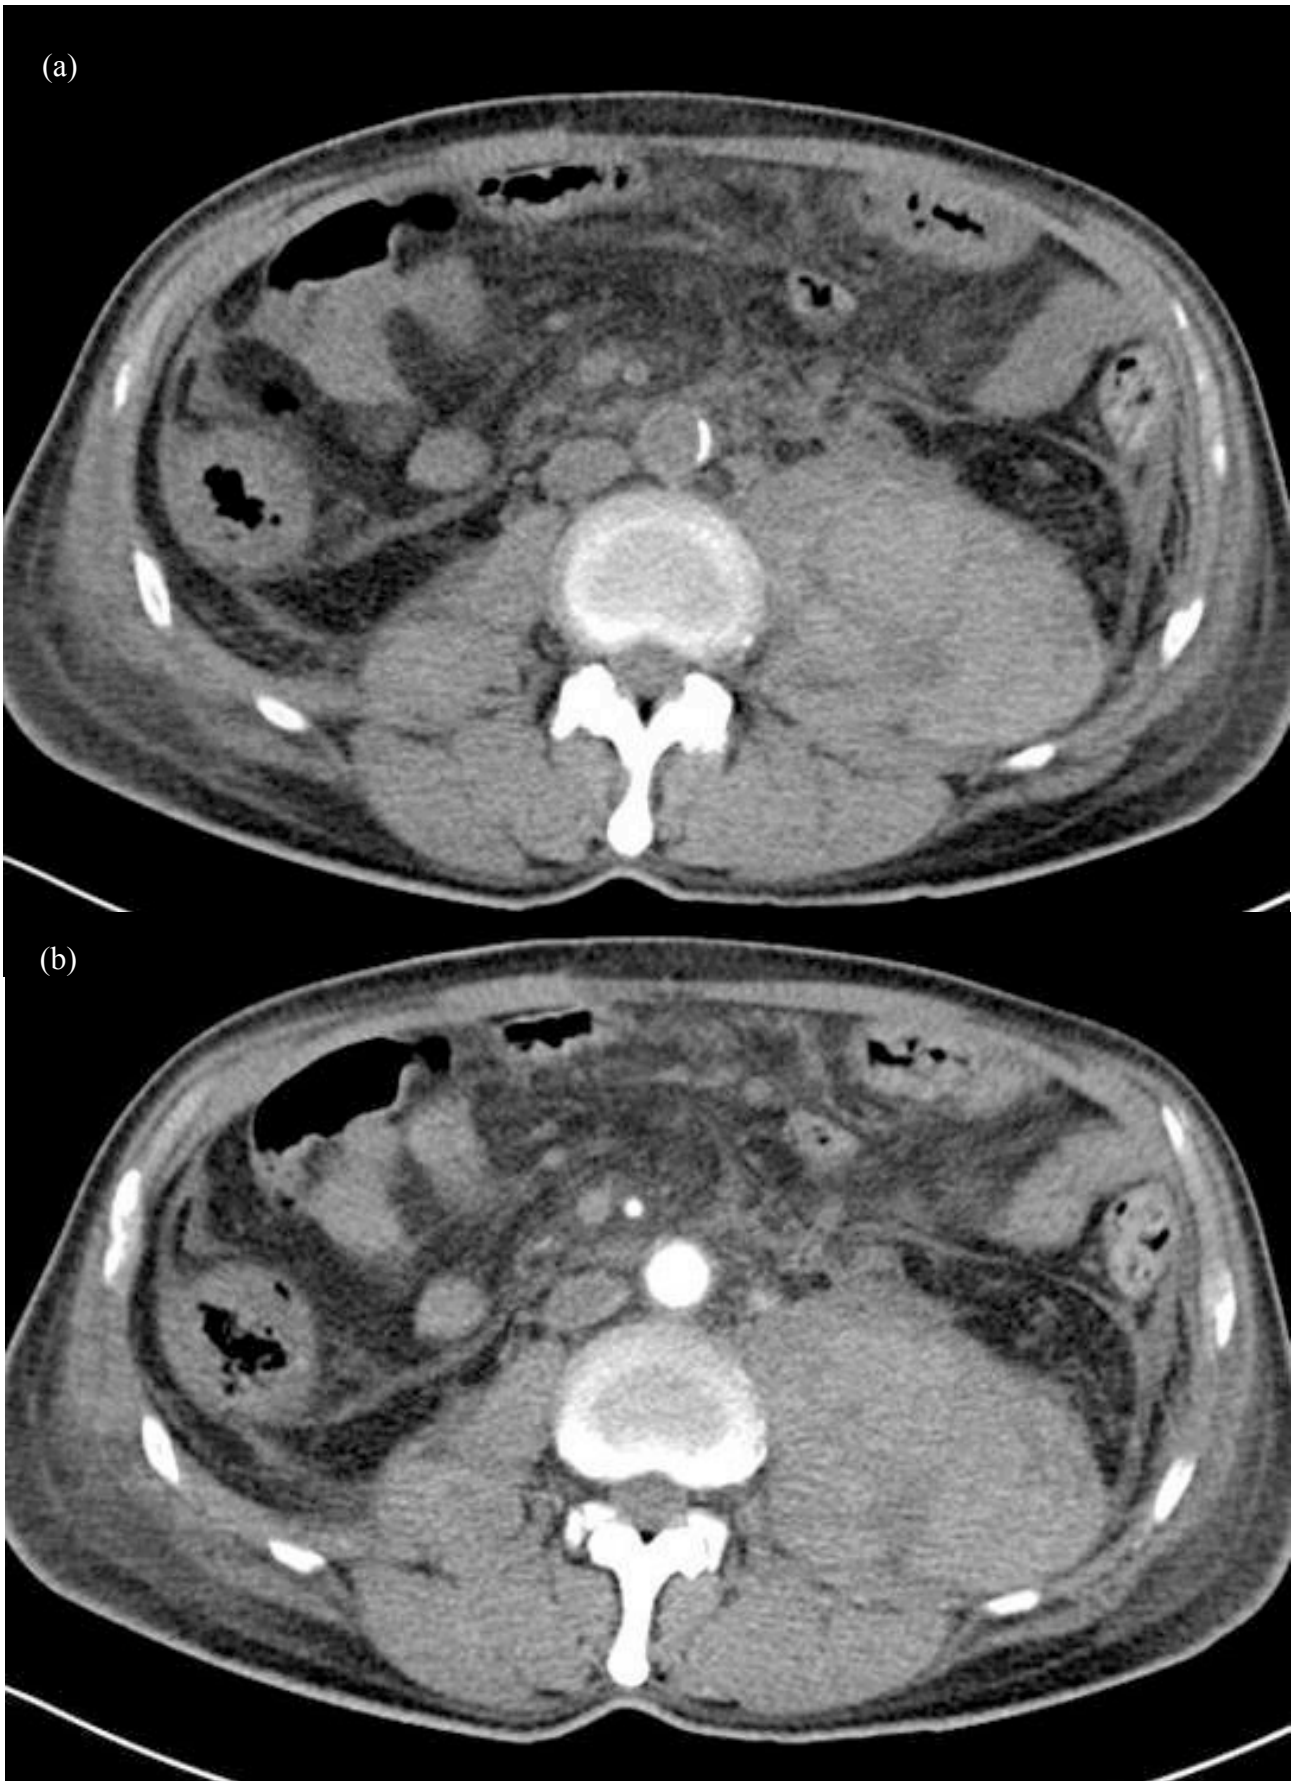

Figure 1 Abdominal CT(plain scan(a) and enhanced(b))showed hematoma of the left psoas major muscle.
